# Supplementary material for: Long term expansion profile of mesenchymal stromal cells at protein nanosheet-stabilised bioemulsions for next generation cell culture microcarriers
Source: PubMed Central journal article supplement (PMC8605361; doi:10.1016/j.mtbio.2021.100159), 2021-11-16
Supplement: mmc1.pdf [file mmc1.pdf]

# Long Term Expansion Profile of Mesenchymal Stromal Cells at Protein Nanosheet-Stabilised Bioemulsions for Next Generation Cell Culture Microcarriers

## Supplementary Information

Lihui Peng<sup>1,2</sup> and Julien E. Gautrot<sup>1,2\*</sup>

<sup>1</sup>*Institute of Bioengineering and* <sup>2</sup>*School of Engineering and Materials Science, Queen Mary, University of London, Mile End Road, London, E1 4NS, UK.*

*\*Corresponding author. [j.gautrot@qmul.ac.uk](mailto:j.gautrot@qmul.ac.uk)*

### Supplementary Table S1. List of Primers for PCR

| Gene Name                                   | Assav ID      |
|---------------------------------------------|---------------|
| Beta-2-microglobulin (B2M)                  | Hs00187842 m1 |
| Nestin                                      | Hs04187831 g1 |
| Thy-1 cell surface antigen (THY)            | Hs00174816 m1 |
| Vascular cell adhesion molecule 1 (VCAM1)   | Hs01003372 m1 |
| Fatty acid binding protein 4 (FABP4)        | Hs01086177 m1 |
| Lipoprotein lipase (LPL)                    | Hs00173425 m1 |
| Runt related transcription factor 2 (RUNX2) | Hs01047973 m1 |
| Collagen type I alpha 1 (COL1A1)            | Hs00164004 m1 |
| Bone morphogenetic protein 2 (BMP2)         | Hs00154192 m1 |
| Osteocalcin (OCN)                           | Hs01587814 g1 |
| SRY-box 9 (SOX9)                            | Hs00165814 m1 |
| Collagen type II alpha 1 chain (COL2A1)     | Hs00264051 m1 |
| Collagen type X alpha 1 chain (COL10A1)     | Hs00166657 m1 |

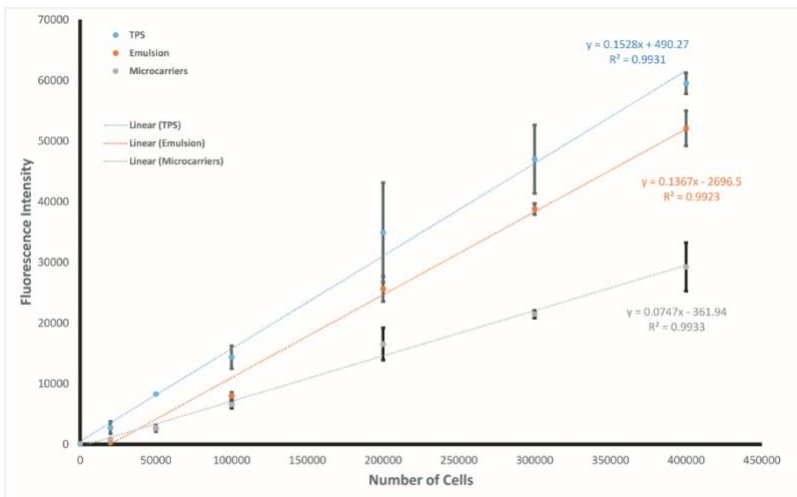

**Supplementary Figure S1.** Calibration curve for the conversion of CyQUANT™ assay intensities in cell densities characterised in different culture systems. Linear regression fitting of the CyQUANT™ assay intensity data corresponding to MSCs introduced on TPS (blue), bioemulsion (orange) and solid microcarriers (grey). Error bars are s.e.m; n = 3.

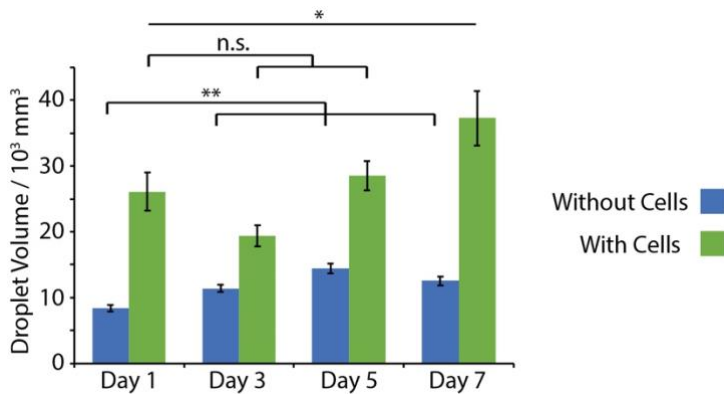

**Supplementary Figure S2.** Volume of PLL/FN stabilised microdroplets forming bioemulsions quantified over a period of 7 days. Error bars are s.e.m; n = 3.

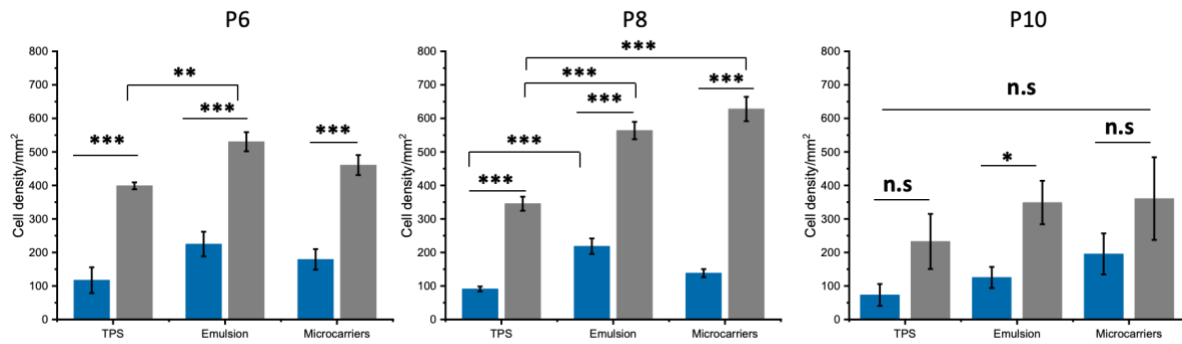

**Supplementary Figure S3.** MSC proliferation on TPS, bioemulsions and solid microcarriers at passage 6, 8 and 10 (corresponding to 6 subsequent passages, from MSCs cultured at P3). MSC densities were quantified via CyQUANT™ assay at days 1 (blue bars) and 5 (grey bars). Error bars are s.e.m; n represents number of experiments,  $n \geq 3$ .

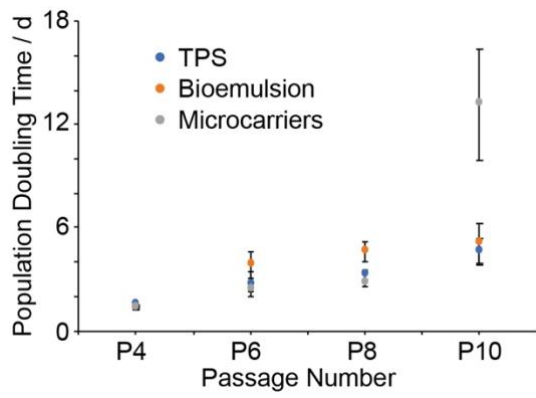

**Supplementary Figure S4.** MSCs population doubling times measured from CyQUANT™ assays, on different culture substrates, at different passage numbers. Error bars are s.e.m; n represents number of experiments,  $n \geq 3$ .

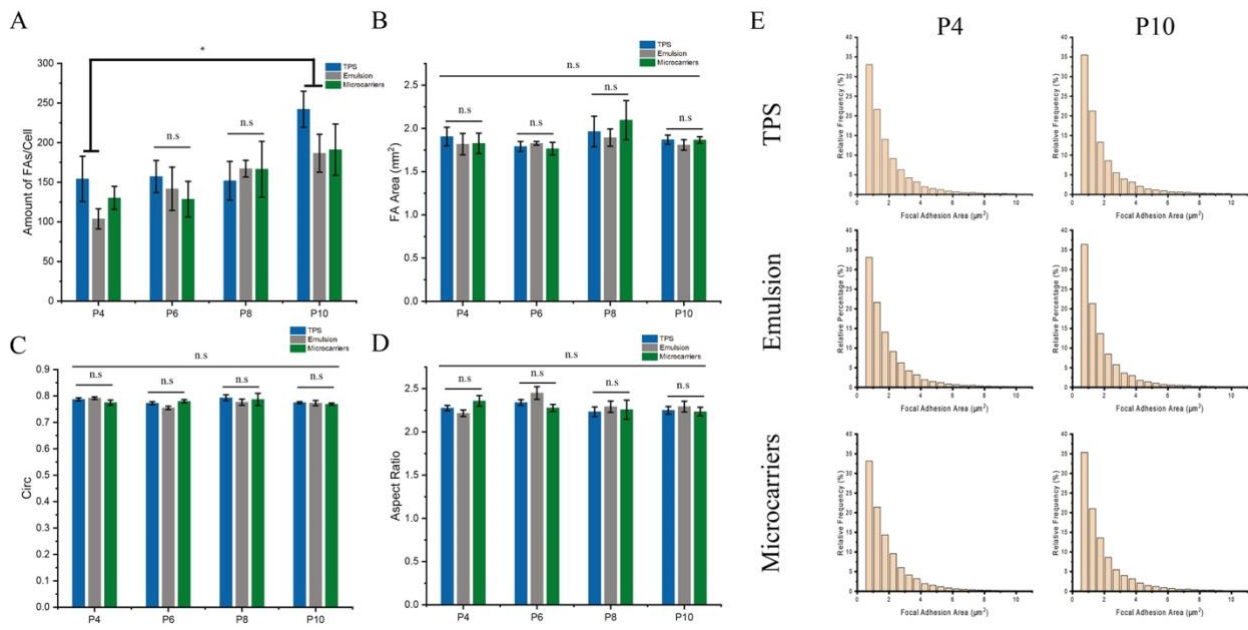

**Supplementary Figure S5.** MSC adhesions are comparable for cells cultured on TPS, bioemulsions and solid microcarriers over a broad period of cell expansion. Corresponding quantification of focal adhesion (from vinculin stainings) numbers (A), area (B), circularity (C) and aspect ratio (D). Error bars are s.e.m;  $n \geq 3$ , more than 40 cells for each condition were measured in each experiment. E) Histogram of focal adhesion size distributions.

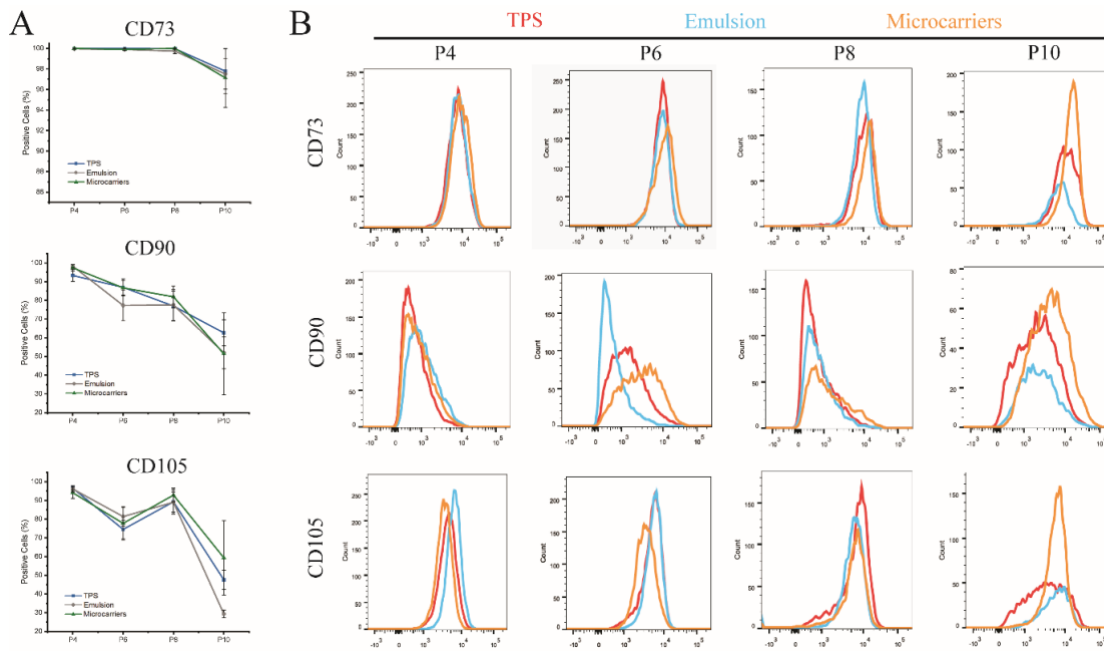

**Supplementary Figure S6.** MSCs retained comparable surface marker expression when cultured on TPS, bioemulsions and solid microcarriers for prolonged times. A) Evolution of the percentage of MSCs positive for individual markers (CD73, top; CD90, middle; CD105, bottom). Error bars are s.e.m;  $n \geq 3$ . B) Representative examples of the fluorescence intensity distribution for individual surface markers for cells cultured on different substrates at different passage times. Red, TPS; blue, emulsion; orange, solid microcarriers.

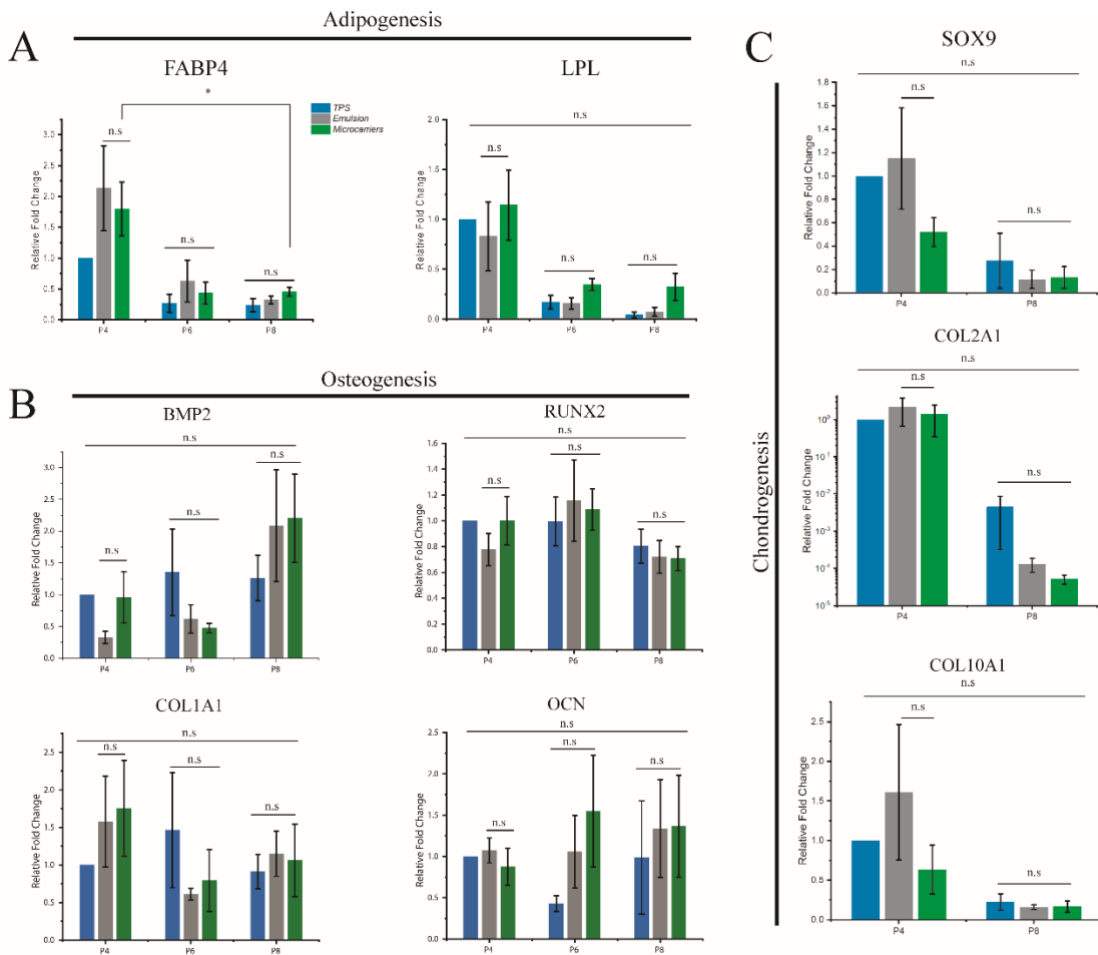

**Supplementary Figure S7.** Evaluation of MSC multipotency over long-term culture on TPS, bioemulsions and solid microcarriers, followed by differentiation in defined conditions and quantification of the expression of differentiation-associated genes by RT-PCR. MSCs were harvested from different substrates and subsequently cultured on TPS in differentiation media (14 days for adipogenic and osteogenic differentiation, 21 days for chondrogenesis). Relative fold changes of marker genes expressed by MSCs harvested from different substrates and subsequently differentiated on TPS, relative to that of P4 MSCs on TPS in differentiation medium. (A) adipogenesis; (B) osteogenesis and (C) chondrogenesis. Error bars are s.e.m;  $n \geq 3$ .

**Supplementary Table S2.** Summary of statistical analysis for data presented in Figure 2B. Results of one-way and two way ANOVA are presented separately.

| <b>Without cells</b> |       |                |                     |
|----------------------|-------|----------------|---------------------|
| <b>One-way ANOVA</b> |       | <b>P-value</b> | <b>significance</b> |
| Day 1                | Day 3 | 0.2505         | n.s                 |
| Day 1                | Day 5 | 0.03883        | *                   |
| Day 3                | Day 5 | 0.56449        | n.s                 |
| Day 1                | Day 7 | 0.19788        | n.s                 |
| Day 3                | Day 7 | 0.99784        | n.s                 |
| Day 5                | Day 7 | 0.66357        | n.s                 |

| <b>with cells</b>    |       |                |                     |
|----------------------|-------|----------------|---------------------|
| <b>One-way ANOVA</b> |       | <b>P-value</b> | <b>significance</b> |
| Day 1                | Day 3 | 0.82338        | n.s                 |
| Day 1                | Day 5 | 0.99848        | n.s                 |
| Day 3                | Day 5 | 0.74268        | n.s                 |
| Day 1                | Day 7 | 0.34997        | n.s                 |
| Day 3                | Day 7 | 0.11073        | n.s                 |
| Day 5                | Day 7 | 0.42135        | n.s                 |

| <b>Two-way ANOVA</b> |           | <b>p-value</b> | <b>significance</b> |
|----------------------|-----------|----------------|---------------------|
| without cell         | with cell | 1.67E-06       | ***                 |
| Day 1                | Day 3     | 0.99942        | n.s                 |
| Day 1                | Day 5     | 0.65275        | n.s                 |
| Day 3                | Day 5     | 0.58294        | n.s                 |
| Day 1                | Day 7     | 0.15916        | n.s                 |
| Day 3                | Day 7     | 0.12953        | n.s                 |
| Day 5                | Day 7     | 0.73396        | n.s                 |



**Supplementary Table S3.** Summary of statistical analysis for data presented in Figure 4.

| <b>Figure 4B</b>     |              |                |                     |                      |                     |
|----------------------|--------------|----------------|---------------------|----------------------|---------------------|
| <b>One-way ANOVA</b> |              | <b>Day1</b>    |                     | <b>Day 5</b>         |                     |
|                      |              | <b>p-value</b> | <b>significance</b> | <b>p-value</b>       | <b>significance</b> |
| bioemulsion          | TPS          | 0.73433        | n.s                 | 0.01446              | *                   |
| Microcarriers        | TPS          | 0.25741        | n.s                 | 0.97525              | n.s                 |
| Microcarriers        | bioemulsion  | 0.0973         | n.s                 | 0.01148              | *                   |
|                      |              | <b>TPS</b>     | <b>bioemulsion</b>  | <b>Microcarriers</b> |                     |
| <b>day 1</b>         | <b>day 5</b> | 7.01E-08       | 2.16E-06            | 1.21E-06             |                     |
|                      |              | ***            | ***                 | ***                  |                     |

| <b>Figure 4C</b>     |              |                |                     |                      |                     |
|----------------------|--------------|----------------|---------------------|----------------------|---------------------|
| <b>One-way ANOVA</b> |              | <b>Day1</b>    |                     | <b>Day 5</b>         |                     |
|                      |              | <b>p-value</b> | <b>significance</b> | <b>p-value</b>       | <b>significance</b> |
| bioemulsion          | TPS          | 0.19034        | n.s                 | 0.02568              | *                   |
| Microcarriers        | TPS          | 0.02159        | *                   | 0.002                | **                  |
| Microcarriers        | bioemulsion  | 0.38016        | n.s                 | 0.42667              | n.s                 |
|                      |              | <b>TPS</b>     | <b>bioemulsion</b>  | <b>Microcarriers</b> |                     |
| <b>day 1</b>         | <b>day 5</b> | 7.01E-08       | 2.16E-06            | 1.21E-06             |                     |
|                      |              | ***            | ***                 | ***                  |                     |

**Supplementary Table S4.** Summary of statistical analysis for data presented in Figure 5B.

| <b>One-way ANOVA</b> |               | <b>p-value</b> | <b>significance</b> |
|----------------------|---------------|----------------|---------------------|
| <b>P4</b>            |               |                |                     |
| TPS                  | Emulsion      | 0.17143        | n.s                 |
| TPS                  | Microcarriers | 0.77595        | n.s                 |
| Emulsion             | Microcarriers | 0.44887        | n.s                 |
| <b>P6</b>            |               |                |                     |
| TPS                  | Emulsion      | 0.51215        | n.s                 |
| TPS                  | Microcarriers | 0.64855        | n.s                 |
| Emulsion             | Microcarriers | 0.97098        | n.s                 |
| <b>P8</b>            |               |                |                     |
| TPS                  | Emulsion      | 0.59172        | n.s                 |
| TPS                  | Microcarriers | 0.99343        | n.s                 |
| Emulsion             | Microcarriers | 0.6855         | n.s                 |
| <b>P10</b>           |               |                |                     |
| TPS                  | Emulsion      | 0.42575        | n.s                 |
| TPS                  | Microcarriers | 0.28222        | n.s                 |
| Emulsion             | Microcarriers | 0.87647        | n.s                 |
| <b>TPS</b>           |               |                |                     |
| P4                   | P6            | 0.67298        | n.s                 |
| P4                   | P8            | 0.79029        | n.s                 |
| P6                   | P8            | 0.99371        | n.s                 |
| P4                   | P10           | 1.77E-05       | ***                 |
| P6                   | P10           | 1.58E-04       | ***                 |
| P8                   | P10           | 5.81E-05       | ***                 |
| <b>Emulsion</b>      |               |                |                     |
| P4                   | P6            | 0.99999        | n.s                 |
| P4                   | P8            | 0.97666        | n.s                 |
| P6                   | P8            | 0.9763         | n.s                 |
| P4                   | P10           | 0.00103        | **                  |
| P6                   | P10           | 7.82E-03       | **                  |
| P8                   | P10           | 4.80E-02       | *                   |
| <b>Microcarriers</b> |               |                |                     |
| P4                   | P6            | 0.91888        | n.s                 |
| P4                   | P8            | 0.53885        | n.s                 |
| P6                   | P8            | 0.88293        | n.s                 |
| P4                   | P10           | 0.01093        | *                   |
| P6                   | P10           | 3.09E-02       | *                   |
| P8                   | P10           | 9.77E-02       | *                   |
| <b>Two-way ANOVA</b> |               | <b>p-value</b> | <b>significance</b> |
| emulsion             | TPS           | 0.36577        | n.s                 |
| microcarriers        | TPS           | 0.06707        | n.s                 |
| microcarriers        | emulsion      | 0.5994         | n.s                 |
| P4                   | P6            | 0.39983        | n.s                 |
| P4                   | P8            | 0.02352        | *                   |
| P6                   | P8            | 0.5517         | n.s                 |
| P4                   | P10           | 4.17E-09       | ***                 |
| P6                   | P10           | 0              | ***                 |
| P8                   | P10           | 8.18E-08       | ***                 |

**Supplementary Table S5.** Summary of statistical analysis for data presented in Figure 5C.

| <b>One-way</b> |               |                |                     |
|----------------|---------------|----------------|---------------------|
| <b>P4</b>      |               | <b>p-value</b> | <b>significance</b> |
| TPS            | Emulsion      | 0.96258        | n.s                 |
| TPS            | Microcarriers | 0.99995        | n.s                 |
| Emulsion       | Microcarriers | 0.95976        | n.s                 |

  

| <b>P6</b> |               |         |     |
|-----------|---------------|---------|-----|
| TPS       | Emulsion      | 0.73257 | n.s |
| TPS       | Microcarriers | 0.46796 | n.s |
| Emulsion  | Microcarriers | 0.16982 | n.s |

  

| <b>P8</b> |               |         |     |
|-----------|---------------|---------|-----|
| TPS       | Emulsion      | 0.80777 | n.s |
| TPS       | Microcarriers | 0.66719 | n.s |
| Emulsion  | Microcarriers | 0.33513 | n.s |

  

| <b>P10</b> |               |         |     |
|------------|---------------|---------|-----|
| TPS        | Emulsion      | 0.52235 | n.s |
| TPS        | Microcarriers | 0.9301  | n.s |
| Emulsion   | Microcarriers | 0.81871 | n.s |

  

| <b>TPS</b> |     |          |     |
|------------|-----|----------|-----|
| P4         | P6  | 0.79828  | n.s |
| P4         | P8  | 0.8841   | n.s |
| P6         | P8  | 0.99321  | n.s |
| P4         | P10 | 9.49E-01 | n.s |
| P6         | P10 | 9.76E-01 | n.s |
| P8         | P10 | 9.98E-01 | n.s |

  

| <b>Emulsion</b> |     |          |     |
|-----------------|-----|----------|-----|
| P4              | P6  | 0.99999  | n.s |
| P4              | P8  | 0.97666  | n.s |
| P6              | P8  | 0.9763   | n.s |
| P4              | P10 | 0.70361  | n.s |
| P6              | P10 | 7.54E-01 | n.s |
| P8              | P10 | 4.39E-01 | n.s |

  

| <b>Microcarriers</b> |     |          |     |
|----------------------|-----|----------|-----|
| P4                   | P6  | 0.47136  | n.s |
| P4                   | P8  | 0.44721  | n.s |
| P6                   | P8  | 0.99997  | n.s |
| P4                   | P10 | 0.92358  | n.s |
| P6                   | P10 | 8.90E-01 | n.s |
| P8                   | P10 | 8.93E-01 | n.s |

  

| <b>Two-way ANOVA</b> |          |          |      |
|----------------------|----------|----------|------|
| emulsion             | TPS      | 0.9914   | n.s  |
| microcarriers        | TPS      | 0.49203  | n.s  |
| microcarriers        | emulsion | 0.422    | n.s  |
| P4                   | P6       | 0.4669   | n.s  |
| P4                   | P8       | 0.71194  | n.s  |
| P6                   | P8       | 0.95823  | n.s  |
| P4                   | P10      | 5.30E-01 | n.s. |
| P6                   | P10      | 0.99923  | n.s  |
| P8                   | P10      | 9.82E-01 | n.s  |

**Supplementary Table S6.** Summary of statistical analysis for data presented in Figure 6.

| <b>One-way ANOVA</b> |               |                |                     |
|----------------------|---------------|----------------|---------------------|
|                      |               | <b>p-value</b> | <b>significance</b> |
| <b>P4</b>            |               |                |                     |
| emulsion             | microcarriers | 0.80127        | n.s                 |
| TPS                  | microcarriers | 0.92538        | n.s                 |
| TPS                  | emulsion      | 0.52193        | n.s                 |
| <b>P6</b>            |               |                |                     |
| emulsion             | microcarriers | 0.91663        | n.s                 |
| TPS                  | microcarriers | 0.8778         | n.s                 |
| TPS                  | emulsion      | 0.68816        | n.s                 |
| <b>P8</b>            |               |                |                     |
| emulsion             | microcarriers | 0.81157        | n.s                 |
| TPS                  | microcarriers | 0.90366        | n.s                 |
| TPS                  | emulsion      | 0.97951        | n.s                 |
| <b>P10</b>           |               |                |                     |
| emulsion             | microcarriers | 0.98908        | n.s                 |
| TPS                  | microcarriers | 0.2401         | n.s                 |
| TPS                  | emulsion      | 0.29605        | n.s                 |
| <b>TPS</b>           |               |                |                     |
| P4                   | P6            | 0.22839        | n.s                 |
| P4                   | P8            | 0.27474        | n.s                 |
| P6                   | P8            | 0.99686        | n.s                 |
| P4                   | P10           | 2.04E-04       | ***                 |
| P6                   | P10           | 3.11E-03       | **                  |
| P8                   | P10           | 1.87E-02       | *                   |
| <b>emulsion</b>      |               |                |                     |
| P4                   | P6            | 7.07E-04       | ***                 |
| P4                   | P8            | 0.00418        | **                  |
| P6                   | P8            | 0.90701        | n.s                 |
| P4                   | P10           | 2.26E-07       | ***                 |
| P6                   | P10           | 1.06E-04       | ***                 |
| P8                   | P10           | 8.53E-05       | ***                 |
| <b>microcarriers</b> |               |                |                     |
| P4                   | P6            | 1.69E-01       | n.s                 |
| P4                   | P8            | 0.55285        | n.s                 |
| P6                   | P8            | 0.89765        | n.s                 |
| P4                   | P10           | 4.97E-04       | ***                 |
| P6                   | P10           | 3.75E-03       | **                  |
| P8                   | P10           | 3.83E-03       | **                  |
| <b>Two-way ANOVA</b> |               |                |                     |
| emulsion             | microcarriers | 0.91409        | n.s                 |
| microcarriers        | TPS           | 0.95134        | n.s                 |
| TPS                  | emulsion      | 0.99194        | n.s                 |
| P4                   | P6            | 6.17E-05       | ***                 |
| P4                   | P8            | 0.00218        | **                  |
| P6                   | P8            | 0.95681        | n.s                 |
| P4                   | P10           | 0.00E+00       | ***                 |
| P6                   | P10           | 0              | ***                 |
| P8                   | P10           | 1.50E-09       | ***                 |

**Supplementary Table S7.** Summary of statistical analysis for data presented in Figure 7.

| <b>One-way ANOVA</b> |               |                |                     |                      |               |                |                     |                      |               |                |                     |
|----------------------|---------------|----------------|---------------------|----------------------|---------------|----------------|---------------------|----------------------|---------------|----------------|---------------------|
| <b>THY</b>           |               |                |                     | <b>NES</b>           |               |                |                     | <b>VCAM</b>          |               |                |                     |
| <b>TPS</b>           |               | <b>p-value</b> | <b>significance</b> | <b>TPS</b>           |               | <b>p-value</b> | <b>significance</b> | <b>TPS</b>           |               | <b>p-value</b> | <b>significance</b> |
| P4                   | P6            | 0.97993        | n.s                 | P4                   | P6            | 0.39904        | n.s                 | P4                   | P6            | 0.99278        | n.s                 |
| P4                   | P8            | 0.7636         | n.s                 | P4                   | P8            | 0.18308        | n.s                 | P4                   | P8            | 0.7233         | n.s                 |
| P6                   | P8            | 0.91439        | n.s                 | P6                   | P8            | 0.9009         | n.s                 | P6                   | P8            | 0.50092        | n.s                 |
| P4                   | P10           | 0.95219        | n.s                 | P4                   | P10           | 0.21736        | n.s                 | P4                   | P10           | 0.90989        | n.s                 |
| P6                   | P10           | 0.99826        | n.s                 | P6                   | P10           | 0.93856        | n.s                 | P6                   | P10           | 0.7498         | n.s                 |
| P8                   | P10           | 0.96714        | n.s                 | P8                   | P10           | 0.99958        | n.s                 | P8                   | P10           | 0.97801        | n.s                 |
| <b>Emulsion</b>      |               |                |                     |                      |               |                |                     |                      |               |                |                     |
| P4                   | P6            | 0.97889        | n.s                 | P4                   | P6            | 0.62342        | n.s                 | P4                   | P6            | 0.90531        | n.s                 |
| P4                   | P8            | 0.96224        | n.s                 | P4                   | P8            | 0.67377        | n.s                 | P4                   | P8            | 0.99906        | n.s                 |
| P6                   | P8            | 0.99943        | n.s                 | P6                   | P8            | 1              | n.s                 | P6                   | P8            | 0.96282        | n.s                 |
| P4                   | P10           | 0.29017        | n.s                 | P4                   | P10           | 0.70528        | n.s                 | P4                   | P10           | 0.99998        | n.s                 |
| P6                   | P10           | 0.43463        | n.s                 | P6                   | P10           | 0.99995        | n.s                 | P6                   | P10           | 0.9107         | n.s                 |
| P8                   | P10           | 0.5491         | n.s                 | P8                   | P10           | 0.99994        | n.s                 | P8                   | P10           | 0.99838        | n.s                 |
| <b>Microcarriers</b> |               |                |                     | <b>Microcarriers</b> |               |                |                     | <b>Microcarriers</b> |               |                |                     |
| P4                   | P6            | 0.44783        | n.s                 | P4                   | P6            | 0.5953         | n.s                 | P4                   | P6            | 0.98662        | n.s                 |
| P4                   | P8            | 0.39722        | n.s                 | P4                   | P8            | 1              | n.s                 | P4                   | P8            | 0.89247        | n.s                 |
| P6                   | P8            | 0.99762        | n.s                 | P6                   | P8            | 0.59738        | n.s                 | P6                   | P8            | 0.68403        | n.s                 |
| P4                   | P10           | 0.4225         | n.s                 | P4                   | P10           | 0.86392        | n.s                 | P4                   | P10           | 0.96503        | n.s                 |
| P6                   | P10           | 0.99911        | n.s                 | P6                   | P10           | 0.97318        | n.s                 | P6                   | P10           | 0.80894        | n.s                 |
| P8                   | P10           | 0.99995        | n.s                 | P8                   | P10           | 0.86532        | n.s                 | P8                   | P10           | 0.99108        | n.s                 |
| <b>P4</b>            |               |                |                     | <b>P4</b>            |               |                |                     | <b>P4</b>            |               |                |                     |
| Emulsion             | TPS           | 0.87233        | n.s                 | Emulsion             | TPS           | 0.83955        | n.s                 | Emulsion             | TPS           | 0.88972        | n.s                 |
| Microcarriers        | TPS           | 0.73332        | n.s                 | Microcarriers        | TPS           | 0.40617        | n.s                 | Microcarriers        | TPS           | 0.40772        | n.s                 |
| Microcarriers        | Emulsion      | 0.96301        | n.s                 | Microcarriers        | Emulsion      | 0.73193        | n.s                 | Microcarriers        | Emulsion      | 0.60315        | n.s                 |
| <b>P6</b>            |               |                |                     | <b>P6</b>            |               |                |                     | <b>P6</b>            |               |                |                     |
| Emulsion             | TPS           | 0.98045        | n.s                 | Emulsion             | TPS           | 0.66048        | n.s                 | Emulsion             | TPS           | 0.14156        | n.s                 |
| Microcarriers        | TPS           | 0.49786        | n.s                 | Microcarriers        | TPS           | 0.99298        | n.s                 | Microcarriers        | TPS           | 0.1064         | n.s                 |
| Microcarriers        | Emulsion      | 0.39658        | n.s                 | Microcarriers        | Emulsion      | 0.59158        | n.s                 | Microcarriers        | Emulsion      | 0.98352        | n.s                 |
| <b>P8</b>            |               |                |                     | <b>P8</b>            |               |                |                     | <b>P8</b>            |               |                |                     |
| Emulsion             | TPS           | 0.98045        | n.s                 | Emulsion             | TPS           | 0.51884        | n.s                 | Emulsion             | TPS           | 0.95946        | n.s                 |
| Microcarriers        | TPS           | 0.49786        | n.s                 | Microcarriers        | TPS           | 0.9494         | n.s                 | Microcarriers        | TPS           | 0.63697        | n.s                 |
| Microcarriers        | Emulsion      | 0.39658        | n.s                 | Microcarriers        | Emulsion      | 0.70098        | n.s                 | Microcarriers        | Emulsion      | 0.48745        | n.s                 |
| <b>P10</b>           |               |                |                     | <b>P10</b>           |               |                |                     | <b>P10</b>           |               |                |                     |
| Emulsion             | TPS           | 0.60032        | n.s                 | Emulsion             | TPS           | 0.9368         | n.s                 | Emulsion             | TPS           | 0.98706        | n.s                 |
| Microcarriers        | TPS           | 0.82913        | n.s                 | Microcarriers        | TPS           | 0.73794        | n.s                 | Microcarriers        | TPS           | 0.46708        | n.s                 |
| Microcarriers        | Emulsion      | 0.92872        | n.s                 | Microcarriers        | Emulsion      | 0.91325        | n.s                 | Microcarriers        | Emulsion      | 0.38737        | n.s                 |
| <b>TWO-way ANOVA</b> |               |                |                     |                      |               |                |                     |                      |               |                |                     |
| <b>THY</b>           |               | <b>p-value</b> | <b>significance</b> | <b>NES</b>           |               | <b>p-value</b> | <b>significance</b> | <b>VCAM</b>          |               | <b>p-value</b> | <b>significance</b> |
| TPS                  | emulsion      | 0.947          | n.s                 | TPS                  | emulsion      | 0.82167        | n.s                 | TPS                  | emulsion      | 0.73959        | n.s                 |
| TPS                  | microcarriers | 0.61133        | n.s                 | TPS                  | microcarriers | 0.64961        | n.s                 | TPS                  | microcarriers | 0.0161         | *                   |
| emulsion             | microcarriers | 0.79344        | n.s                 | emulsion             | microcarriers | 0.95461        | n.s                 | emulsion             | microcarriers | 0.08272        | n.s                 |
| P6                   | P4            | 0.52311        | n.s                 | P6                   | P4            | 0.50538        | n.s                 | P6                   | P4            | 0.99965        | n.s                 |
| P8                   | P4            | 0.28749        | n.s                 | P8                   | P4            | 0.14356        | n.s                 | P8                   | P4            | 0.61979        | n.s                 |
| P8                   | P6            | 0.95306        | n.s                 | P8                   | P6            | 0.78065        | n.s                 | P8                   | P6            | 0.49383        | n.s                 |
| P10                  | P4            | 0.07353        | n.s                 | P10                  | P4            | 0.29372        | n.s                 | P10                  | P4            | 0.79831        | n.s                 |
| P10                  | P6            | 0.6069         | n.s                 | P10                  | P6            | 0.95333        | n.s                 | P10                  | P6            | 0.69292        | n.s                 |
| P10                  | P8            | 0.90977        | n.s                 | P10                  | P8            | 0.97948        | n.s                 | P10                  | P8            | 0.98748        | n.s                 |

**Supplementary Table S8.** Summary of statistical analysis for data presented in Supplementary Figure S2.

| One Way ANOVA |               |      |            |      |
|---------------|---------------|------|------------|------|
|               | Without Cells |      | With Cells |      |
|               | Prob          | Sig  | Prob       | Sig  |
| Days 3/1      | 0.00144       | **   | 0.23237    | n.s. |
| Days 5/1      | 7.81E-12      | ***  | 0.90063    | n.s. |
| Days 5/3      | 0.00242       | **   | 0.04896    | n.s. |
| Days 7/1      | 2.98E-06      | ***  | 0.02649    | *    |
| Days 7/3      | 0.5001        | n.s. | 4.15E-05   | ***  |
| Days 7/5      | 0.14442       | n.s. | 0.1312     | n.s. |

  

| Two Way ANOVA      |          |      |
|--------------------|----------|------|
|                    | Prob     | Sig  |
| Days 3/1           | 0.99534  | n.s. |
| Days 5/1           | 0.00137  | **   |
| Days 5/3           | 6.33E-04 | ***  |
| Days 7/1           | 0.00292  | **   |
| Days 7/3           | 0.00142  | **   |
| Days 7/5           | 0.99946  | n.s. |
| With/Without Cells | 2.22E-16 | ***  |

**Supplementary Table S9.** Summary of statistical analysis for data presented in Supplementary Figure S3.

| <b>P6-Day 1</b> |               | <b>p-value</b> | <b>significance</b> |                      |
|-----------------|---------------|----------------|---------------------|----------------------|
| Emulsion        | TPS           | 0.11406        | n.s                 |                      |
| Microcarriers   | TPS           | 0.45138        | n.s                 |                      |
| Emulsion        | Microcarriers | 0.64265        | n.s                 |                      |
| <b>P6-Day 5</b> |               | <b>p-value</b> | <b>significance</b> |                      |
| Emulsion        | TPS           | 0.00481        | **                  |                      |
| Microcarriers   | TPS           | 0.20964        | n.s                 |                      |
| Emulsion        | Microcarriers | 0.14533        | n.s                 |                      |
| <b>P6</b>       |               | <b>TPS</b>     | <b>Emulsion</b>     | <b>Microcarriers</b> |
| day 1           | day 5         | 3.44E-05       | 6.37E-05            | 6.40E-05             |
|                 |               | ***            | ***                 | ***                  |

| <b>P8-Day 1</b> |               | <b>p-value</b> | <b>significance</b> |                      |
|-----------------|---------------|----------------|---------------------|----------------------|
| Emulsion        | TPS           | 1.04E-04       | ***                 |                      |
| Microcarriers   | TPS           | 0.11698        | n.s                 |                      |
| Emulsion        | Microcarriers | 0.00649        | **                  |                      |
| <b>P8-Day 5</b> |               | <b>p-value</b> | <b>significance</b> |                      |
| Emulsion        | TPS           | 1.95E-04       | ***                 |                      |
| Microcarriers   | TPS           | 1.16E-05       | ***                 |                      |
| Emulsion        | Microcarriers | 0.27716        | n.s                 |                      |
| <b>P8</b>       |               | <b>TPS</b>     | <b>Emulsion</b>     | <b>Microcarriers</b> |
| day 1           | day 5         | 6.51E-06       | 1.70E-06            | 1.58E-07             |
|                 |               | ***            | ***                 | ***                  |

| <b>P10-Day 1</b> |               | <b>p-value</b> | <b>significance</b> |                      |
|------------------|---------------|----------------|---------------------|----------------------|
| Emulsion         | TPS           | 6.87E-01       | n.s                 |                      |
| Microcarriers    | TPS           | 0.15556        | n.s                 |                      |
| Emulsion         | Microcarriers | 0.51252        | n.s                 |                      |
| <b>P10-Day 5</b> |               | <b>p-value</b> | <b>significance</b> |                      |
| Emulsion         | TPS           | 6.61E-01       | n.s                 |                      |
| Microcarriers    | TPS           | 6.07E-01       | n.s                 |                      |
| Emulsion         | Microcarriers | 0.99571        | n.s                 |                      |
| <b>P10</b>       |               | <b>TPS</b>     | <b>Emulsion</b>     | <b>Microcarriers</b> |
| day 1            | day 5         | 1.01E-01       | 1.12E-02            | 2.58E-01             |
|                  |               | n.s            | **                  | n.s                  |

**Supplementary Table S10.** Summary of statistical analysis for data presented in Supplementary Figure S5A.

**One-way ANOVA**

| FA number |     |         |              |
|-----------|-----|---------|--------------|
| TPS       |     | p-value | significance |
| P4        | P6  | 0.74901 | n.s          |
| P4        | P8  | 0.784   | n.s          |
| P6        | P8  | 0.99846 | n.s          |
| P4        | P10 | 0.01502 | *            |
| P6        | P10 | 0.11037 | n.s          |
| P8        | P10 | 0.05002 | n.s          |

| Emulsion |     |         |     |
|----------|-----|---------|-----|
| P4       | P6  | 0.09924 | n.s |
| P4       | P8  | 0.04552 | *   |
| P6       | P8  | 0.99901 | n.s |
| P4       | P10 | 0.01064 | *   |
| P6       | P10 | 0.78461 | n.s |
| P8       | P10 | 0.80873 | n.s |

| Microcarriers |     |         |     |
|---------------|-----|---------|-----|
| P4            | P6  | 0.99997 | n.s |
| P4            | P8  | 0.74405 | n.s |
| P6            | P8  | 0.75163 | n.s |
| P4            | P10 | 0.47754 | n.s |
| P6            | P10 | 0.4919  | n.s |
| P8            | P10 | 0.93066 | n.s |

| P4            |          |         |     |
|---------------|----------|---------|-----|
| Emulsion      | TPS      | 0.77814 | n.s |
| Microcarriers | TPS      | 0.91673 | n.s |
| Microcarriers | Emulsion | 0.50685 | n.s |

| P6            |          |         |     |
|---------------|----------|---------|-----|
| Emulsion      | TPS      | 0.97276 | n.s |
| Microcarriers | TPS      | 0.61773 | n.s |
| Microcarriers | Emulsion | 0.49021 | n.s |

| P8            |          |         |     |
|---------------|----------|---------|-----|
| Emulsion      | TPS      | 0.88982 | n.s |
| Microcarriers | TPS      | 0.90789 | n.s |
| Microcarriers | Emulsion | 0.99977 | n.s |

| P10           |          |         |     |
|---------------|----------|---------|-----|
| Emulsion      | TPS      | 0.24101 | n.s |
| Microcarriers | TPS      | 0.38726 | n.s |
| Microcarriers | Emulsion | 0.99192 | n.s |

**Two-way ANOVA**

| FA number     |          |          |              |
|---------------|----------|----------|--------------|
|               |          | p-value  | significance |
| Emulsion      | TPS      | 0.60921  | n.s          |
| Microcarriers | TPS      | 0.46905  | n.s          |
| Microcarriers | Emulsion | 0.96051  | n.s          |
| P4            | P6       | 0.33823  | n.s          |
| P4            | P8       | 0.06933  | n.s          |
| P6            | P8       | 0.91725  | n.s          |
| P4            | P10      | 5.49E-05 | ***          |
| P6            | P10      | 0.01717  | *            |
| P8            | P10      | 0.0466   | *            |



**Supplementary Table S11.** Summary of statistical analysis for data presented in Supplementary Figure S5B.

| <b>One-way ANOVA</b> |          |                |                     |
|----------------------|----------|----------------|---------------------|
| <b>FA area</b>       |          |                |                     |
| <b>TPS</b>           |          | <b>p-value</b> | <b>significance</b> |
| P4                   | P6       | 0.9757         | n.s                 |
| P4                   | P8       | 0.94296        | n.s                 |
| P6                   | P8       | 0.77819        | n.s                 |
| P4                   | P10      | 1              | n.s                 |
| P6                   | P10      | 0.97528        | n.s                 |
| P8                   | P10      | 0.94373        | n.s                 |
| <b>Emulsion</b>      |          |                |                     |
| P4                   | P6       | 0.99988        | n.s                 |
| P4                   | P8       | 0.92798        | n.s                 |
| P6                   | P8       | 0.95814        | n.s                 |
| P4                   | P10      | 0.99989        | n.s                 |
| P6                   | P10      | 0.99914        | n.s                 |
| P8                   | P10      | 0.90377        | n.s                 |
| <b>Microcarriers</b> |          |                |                     |
| P4                   | P6       | 0.99148        | n.s                 |
| P4                   | P8       | 0.57548        | n.s                 |
| P6                   | P8       | 0.45597        | n.s                 |
| P4                   | P10      | 0.9983         | n.s                 |
| P6                   | P10      | 0.97592        | n.s                 |
| P8                   | P10      | 0.77091        | n.s                 |
| <b>P4</b>            |          |                |                     |
| Emulsion             | TPS      | 0.94887        | n.s                 |
| Microcarriers        | TPS      | 0.96571        | n.s                 |
| Microcarriers        | Emulsion | 0.99819        | n.s                 |
| <b>P6</b>            |          |                |                     |
| Emulsion             | TPS      | 0.89081        | n.s                 |
| Microcarriers        | TPS      | 0.9399         | n.s                 |
| Microcarriers        | Emulsion | 0.71377        | n.s                 |
| <b>P8</b>            |          |                |                     |
| Emulsion             | TPS      | 0.95043        | n.s                 |
| Microcarriers        | TPS      | 0.85247        | n.s                 |
| Microcarriers        | Emulsion | 0.69036        | n.s                 |
| <b>P10</b>           |          |                |                     |
| Emulsion             | TPS      | 0.67587        | n.s                 |
| Microcarriers        | TPS      | 0.99933        | n.s                 |
| Microcarriers        | Emulsion | 0.76311        | n.s                 |
| <b>Two-way ANOVA</b> |          |                |                     |
| <b>FA area</b>       |          |                |                     |
| Emulsion             | TPS      | 0.90181        | n.s                 |
| Microcarriers        | TPS      | 0.96496        | n.s                 |
| Microcarriers        | Emulsion | 0.77701        | n.s                 |
| P4                   | P6       | 0.98864        | n.s                 |
| P4                   | P8       | 0.38676        | n.s                 |
| P6                   | P8       | 0.25553        | n.s                 |
| P4                   | P10      | 9.98E-01       | n.s                 |
| P6                   | P10      | 0.96112        | n.s                 |
| P8                   | P10      | 0.51872        | n.s                 |

**Supplementary Table S12.** Summary of statistical analysis for data presented in Supplementary Figure S5C.

**One-way ANOVA**

**Circ**

| <b>TPS</b> |     | <b>p-value</b> | <b>significance</b> |
|------------|-----|----------------|---------------------|
| P4         | P6  | 0.67148        | n.s                 |
| P4         | P8  | 0.90563        | n.s                 |
| P6         | P8  | 0.30216        | n.s                 |
| P4         | P10 | 0.7373         | n.s                 |
| P6         | P10 | 0.99809        | n.s                 |
| P8         | P10 | 0.33446        | n.s                 |

**Emulsion**

|    |     |         |     |
|----|-----|---------|-----|
| P4 | P6  | 0.06539 | n.s |
| P4 | P8  | 0.60539 | n.s |
| P6 | P8  | 0.37887 | n.s |
| P4 | P10 | 0.48253 | n.s |
| P6 | P10 | 0.55063 | n.s |
| P8 | P10 | 0.99247 | n.s |

**Microcarriers**

|    |     |         |     |
|----|-----|---------|-----|
| P4 | P6  | 0.99578 | n.s |
| P4 | P8  | 0.92856 | n.s |
| P6 | P8  | 0.98515 | n.s |
| P4 | P10 | 0.99384 | n.s |
| P6 | P10 | 0.96999 | n.s |
| P8 | P10 | 0.86215 | n.s |

**P4**

|               |          |         |     |
|---------------|----------|---------|-----|
| Emulsion      | TPS      | 0.84487 | n.s |
| Microcarriers | TPS      | 0.5283  | n.s |
| Microcarriers | Emulsion | 0.25843 | n.s |

**P6**

|               |          |         |     |
|---------------|----------|---------|-----|
| Emulsion      | TPS      | 0.36202 | n.s |
| Microcarriers | TPS      | 0.64225 | n.s |
| Microcarriers | Emulsion | 0.1124  | n.s |

**P8**

|               |          |         |     |
|---------------|----------|---------|-----|
| Emulsion      | TPS      | 0.70397 | n.s |
| Microcarriers | TPS      | 0.95612 | n.s |
| Microcarriers | Emulsion | 0.87937 | n.s |

**P10**

|               |          |         |     |
|---------------|----------|---------|-----|
| Emulsion      | TPS      | 0.98114 | n.s |
| Microcarriers | TPS      | 0.83977 | n.s |
| Microcarriers | Emulsion | 0.91355 | n.s |

**Two-way ANOVA**

| <b>Circ</b>   |          | <b>p-value</b> | <b>significance</b> |
|---------------|----------|----------------|---------------------|
| Emulsion      | TPS      | 0.55026        | n.s                 |
| Microcarriers | TPS      | 0.84318        | n.s                 |
| Microcarriers | Emulsion | 0.89283        | n.s                 |
| P4            | P6       | 0.33206        | n.s                 |
| P4            | P8       | 0.99954        | n.s                 |
| P6            | P8       | 0.24873        | n.s                 |
| P4            | P10      | 5.50E-01       | n.s                 |
| P6            | P10      | 0.97852        | n.s                 |
| P8            | P10      | 0.44852        | n.s                 |

**Supplementary Table S13.** Summary of statistical analysis for data presented in Supplementary Figure S5D.

| <b>One-way ANOVA</b> |          |                |                     |
|----------------------|----------|----------------|---------------------|
| <b>Aspect ratio</b>  |          |                |                     |
| <b>TPS</b>           |          | <b>p-value</b> | <b>significance</b> |
| P4                   | P6       | 0.72259        | n.s                 |
| P4                   | P8       | 0.94167        | n.s                 |
| P6                   | P8       | 0.3955         | n.s                 |
| P4                   | P10      | 0.99164        | n.s                 |
| P6                   | P10      | 0.56422        | n.s                 |
| P8                   | P10      | 0.99319        | n.s                 |
| <b>Emulsion</b>      |          |                |                     |
| P4                   | P6       | 0.07652        | n.s                 |
| P4                   | P8       | 0.78266        | n.s                 |
| P6                   | P8       | 0.28557        | n.s                 |
| P4                   | P10      | 0.79774        | n.s                 |
| P6                   | P10      | 0.32099        | n.s                 |
| P8                   | P10      | 1              | n.s                 |
| <b>Microcarriers</b> |          |                |                     |
| P4                   | P6       | 0.88507        | n.s                 |
| P4                   | P8       | 0.77288        | n.s                 |
| P6                   | P8       | 0.99779        | n.s                 |
| P4                   | P10      | 0.73708        | n.s                 |
| P6                   | P10      | 0.98528        | n.s                 |
| P8                   | P10      | 0.99726        | n.s                 |
| <b>P4</b>            |          |                |                     |
| Emulsion             | TPS      | 0.70567        | n.s                 |
| Microcarriers        | TPS      | 0.36646        | n.s                 |
| Microcarriers        | Emulsion | 0.10825        | n.s                 |
| <b>P6</b>            |          |                |                     |
| Emulsion             | TPS      | 0.74306        | n.s                 |
| Microcarriers        | TPS      | 0.41626        | n.s                 |
| Microcarriers        | Emulsion | 0.17803        | n.s                 |
| <b>P8</b>            |          |                |                     |
| Emulsion             | TPS      | 0.8447         | n.s                 |
| Microcarriers        | TPS      | 0.97335        | n.s                 |
| Microcarriers        | Emulsion | 0.94881        | n.s                 |
| <b>P10</b>           |          |                |                     |
| Emulsion             | TPS      | 0.80738        | n.s                 |
| Microcarriers        | TPS      | 0.97926        | n.s                 |
| Microcarriers        | Emulsion | 0.74576        | n.s                 |
| <b>Two-way ANOVA</b> |          |                |                     |
| <b>Aspect ratio</b>  |          | <b>p-value</b> | <b>significance</b> |
| Emulsion             | TPS      | 0.66796        | n.s                 |
| Microcarriers        | TPS      | 0.89414        | n.s                 |
| Microcarriers        | Emulsion | 0.92426        | n.s                 |
| P4                   | P6       | 0.51433        | n.s                 |
| P4                   | P8       | 0.97353        | n.s                 |
| P6                   | P8       | 0.26073        | n.s                 |
| P4                   | P10      | 9.82E-01       | n.s                 |
| P6                   | P10      | 0.32519        | n.s                 |
| P8                   | P10      | 0.99999        | n.s                 |

**Supplementary Table S14.** Summary of statistical analysis for data presented in Supplementary Figure S6.

| One-way       |          |         |              |              |          |         |              |               |          |         |              |
|---------------|----------|---------|--------------|--------------|----------|---------|--------------|---------------|----------|---------|--------------|
| <b>CD105</b>  |          |         |              | <b>CD73</b>  |          |         |              | <b>CD90</b>   |          |         |              |
| <b>p4</b>     |          | p-value | significance | <b>p4</b>    |          | p-value | significance | <b>p4</b>     |          | p-value | significance |
| emulsion      | TPS      | 0.9856  | n.s          | emulsion     | TPS      | 0.59513 | n.s          | emulsion      | TPS      | 0.22612 | n.s          |
| microcarriers | TPS      | 0.7020  | n.s          | microcarrier | TPS      | 1       | n.s          | microcarriers | TPS      | 0.43398 | n.s          |
| microcarriers | emulsion | 0.7659  | n.s          | microcarrier | emulsion | 0.64284 | n.s          | microcarriers | emulsion | 0.95328 | n.s          |
| <b>P6</b>     |          |         |              | <b>P6</b>    |          |         |              | <b>P6</b>     |          |         |              |
| emulsion      | TPS      | 0.8262  | n.s          | emulsion     | TPS      | 0.72141 | n.s          | emulsion      | TPS      | 0.47577 | n.s          |
| microcarriers | TPS      | 0.9502  | n.s          | microcarrier | TPS      | 0.67739 | n.s          | microcarriers | TPS      | 0.99933 | n.s          |
| microcarriers | emulsion | 0.9366  | n.s          | microcarrier | emulsion | 1       | n.s          | microcarriers | emulsion | 0.43299 | n.s          |
| <b>P8</b>     |          |         |              | <b>P8</b>    |          |         |              | <b>P8</b>     |          |         |              |
| emulsion      | TPS      | 0.9996  | n.s          | emulsion     | TPS      | 0.56831 | n.s          | emulsion      | TPS      | 0.99861 | n.s          |
| microcarriers | TPS      | 0.8857  | n.s          | microcarrier | TPS      | 0.98738 | n.s          | microcarriers | TPS      | 0.88955 | n.s          |
| microcarriers | emulsion | 0.8738  | n.s          | microcarrier | emulsion | 0.48755 | n.s          | microcarriers | emulsion | 0.91073 | n.s          |
| <b>P10</b>    |          |         |              | <b>P10</b>   |          |         |              | <b>P10</b>    |          |         |              |
| emulsion      | TPS      | 0.3777  | n.s          | emulsion     | TPS      | 0.99586 | n.s          | emulsion      | TPS      | 0.80717 | n.s          |
| microcarriers | TPS      | 0.6363  | n.s          | microcarrier | TPS      | 0.97588 | n.s          | microcarriers | TPS      | 0.78582 | n.s          |
| microcarriers | emulsion | 0.9029  | n.s          | microcarrier | emulsion | 0.99325 | n.s          | microcarriers | emulsion | 0.99931 | n.s          |

| One-way ANOVA |     |          |              |      |     |          |              |      |     |          |              |
|---------------|-----|----------|--------------|------|-----|----------|--------------|------|-----|----------|--------------|
| TPS           |     |          |              |      |     |          |              |      |     |          |              |
| CD105         |     | p-value  | significance | CD73 |     | p-value  | significance | CD90 |     | p-value  | significance |
| P4            | P6  | 0.02938  | *            | P4   | P6  | 1        | n.s          | P4   | P6  | 0.87814  | n.s          |
| P4            | P8  | 0.74898  | n.s          | P4   | P8  | 1        | n.s          | P4   | P8  | 0.33202  | n.s          |
| P6            | P8  | 0.23225  | n.s          | P6   | P8  | 1        | n.s          | P6   | P8  | 0.70479  | n.s          |
| P4            | P10 | 2.94E-05 | ***          | P4   | P10 | 6.49E-01 | n.s          | P4   | P10 | 1.18E-02 | *            |
| P6            | P10 | 0.00557  | **           | P6   | P10 | 0.64929  | n.s          | P6   | P10 | 0.04638  | *            |
| P8            | P10 | 3.12E-04 | ***          | P8   | P10 | 7.14E-01 | n.s          | P8   | P10 | 3.98E-01 | n.s          |

| One-way ANOVA |     |          |              |      |     |          |              |      |     |          |              |
|---------------|-----|----------|--------------|------|-----|----------|--------------|------|-----|----------|--------------|
| Emulsion      |     |          |              |      |     |          |              |      |     |          |              |
| CD105         |     | p-value  | significance | CD73 |     | p-value  | significance | CD90 |     | p-value  | significance |
| P4            | P6  | 0.04413  | *            | P4   | P6  | 0.9998   | n.s          | P4   | P6  | 0.09992  | n.s          |
| P4            | P8  | 0.54644  | n.s          | P4   | P8  | 0.99209  | n.s          | P4   | P8  | 0.14537  | n.s          |
| P6            | P8  | 0.52027  | n.s          | P6   | P8  | 0.9972   | n.s          | P6   | P8  | 0.99999  | n.s          |
| P4            | P10 | 1.61E-07 | ***          | P4   | P10 | 4.96E-02 | *            | P4   | P10 | 1.35E-03 | **           |
| P6            | P10 | 5.90E-06 | ***          | P6   | P10 | 0.06935  | n.s          | P6   | P10 | 0.0785   | n.s          |
| P8            | P10 | 2.90E-06 | ***          | P8   | P10 | 1.25E-01 | n.s          | P8   | P10 | 1.01E-01 | n.s          |

| One-way ANOVA |     |         |              |      |     |         |              |      |     |         |              |
|---------------|-----|---------|--------------|------|-----|---------|--------------|------|-----|---------|--------------|
| Microcarriers |     |         |              |      |     |         |              |      |     |         |              |
| CD105         |     | p-value | significance | CD73 |     | p-value | significance | CD90 |     | p-value | significance |
| P4            | P6  | 0.664   | n.s          | P4   | P6  | 0.99989 | n.s          | P4   | P6  | 0.8304  | n.s          |
| P4            | P8  | 0.99981 | n.s          | P4   | P8  | 1       | n.s          | P4   | P8  | 0.71642 | n.s          |
| P6            | P8  | 0.71598 | n.s          | P6   | P8  | 0.99989 | n.s          | P6   | P8  | 0.98014 | n.s          |
| P4            | P10 | 0.01923 | *            | P4   | P10 | 0.37706 | n.s          | P4   | P10 | 0.03845 | *            |
| P6            | P10 | 0.0527  | n.s          | P6   | P10 | 0.29226 | n.s          | P6   | P10 | 0.06973 | n.s          |
| P8            | P10 | 0.02194 | *            | P8   | P10 | 0.37706 | n.s          | P8   | P10 | 0.21181 | n.s          |

**Two-way ANOVA**

| <b>CD105</b>  |          | p-value  | significance |
|---------------|----------|----------|--------------|
| Emulsion      | TPS      | 0.79158  | n.s          |
| Microcarriers | TPS      | 0.96218  | n.s          |
| Microcarriers | Emulsion | 0.92264  | n.s          |
| P4            | P6       | 0.00623  | **           |
| P4            | P8       | 0.78412  | n.s          |
| P6            | P8       | 0.12802  | n.s          |
| P4            | P10      | 1.92E-07 | ***          |
| P6            | P10      | 1.44E-08 | ***          |
| P8            | P10      | 0        | ***          |

| <b>CD73</b>   |          | p-value  | significance |
|---------------|----------|----------|--------------|
| Emulsion      | TPS      | 0.98776  | n.s          |
| Microcarriers | TPS      | 0.99309  | n.s          |
| Microcarriers | Emulsion | 0.99925  | n.s          |
| P4            | P6       | 0.99987  | n.s          |
| P4            | P8       | 0.99969  | n.s          |
| P6            | P8       | 0.99999  | n.s          |
| P4            | P10      | 2.45E-02 | *            |
| P6            | P10      | 2.23E-02 | *            |
| P8            | P10      | 0.05132  | n.s          |

| <b>CD90</b>   |          | p-value  | significance |
|---------------|----------|----------|--------------|
| Emulsion      | TPS      | 0.99902  | n.s          |
| Microcarriers | TPS      | 0.93312  | n.s          |
| Microcarriers | Emulsion | 0.94923  | n.s          |
| P4            | P6       | 0.11502  | n.s          |
| P4            | P8       | 0.02721  | *            |
| P6            | P8       | 0.8      | n.s          |
| P4            | P10      | 9.01E-08 | ***          |
| P6            | P10      | 6.68E-05 | ***          |
| P8            | P10      | 0.00435  | **           |

**Supplementary Table S15.** Summary of statistical analysis for data presented in Supplementary Figure S7A.

| One-way ANOVA        |            |                |              | One-way ANOVA        |           |                |              |
|----------------------|------------|----------------|--------------|----------------------|-----------|----------------|--------------|
| <b>FABP4</b>         |            |                |              | <b>LPL</b>           |           |                |              |
| <b>TPS</b>           |            | p-value        | significance | <b>TPS</b>           |           | p-value        | significance |
| P6                   | P8         | 0.85436        | n.s          | P6                   | P8        | 0.18638        | n.s          |
| <b>Emulsion</b>      |            | p-value        | significance | <b>Emulsion</b>      |           | p-value        | significance |
| P4                   | P6         | 0.16792        | n.s          | P4                   | P6        | 0.12625        | n.s          |
| P4                   | P8         | 0.09491        | n.s          | P4                   | P8        | 0.11011        | n.s          |
| P6                   | P8         | 0.92052        | n.s          | P6                   | P8        | 0.96378        | n.s          |
| <b>Microcarriers</b> |            | p-             | significance | <b>Microcarriers</b> |           | p-value        | significance |
| P4                   | P6         | 0.0521         | n.s          | P4                   | P6        | 0.08522        | n.s          |
| P4                   | P8         | 0.04887        | *            | P4                   | P8        | 0.10126        | n.s          |
| P6                   | P8         | 0.99894        | n.s          | P6                   | P8        | 0.99751        | n.s          |
| P4 microcarriers     |            | p-value        | significance | P4 microcarriers     |           | p-value        | significance |
| Emulsion             |            | 0.69425        | n.s          | Emulsion             |           | 0.54567        | n.s          |
| P6 emulsion          |            | p-value        | significance | P6 emulsion          |           | p-value        | significance |
| TPS                  |            | 0.56412        | n.s          | TPS                  |           | 0.98564        | n.s          |
| Microcarriers        |            | 0.87611        | n.s          | Microcarriers        |           | 0.16039        | n.s          |
| Microcarriers        |            | 0.83764        | n.s          | Microcarriers        |           | 0.12593        | n.s          |
| P8 emulsion          |            | p-value        | significance | P8 emulsion          |           | p-value        | significance |
| TPS                  |            | 0.22848        | n.s          | TPS                  |           | 0.97075        | n.s          |
| Microcarriers        |            | 0.747          | n.s          | Microcarriers        |           | 0.11984        | n.s          |
| Microcarriers        |            | 0.53788        | n.s          | Microcarriers        |           | 0.16124        | n.s          |
| <b>Two-way ANOVA</b> |            | <b>p-value</b> |              | <b>Two-way ANOVA</b> |           | <b>p-value</b> |              |
| Emulsion             | TPS        | 0.04468        | *            | Emulsion             | TPS       | 0.3142         | n.s          |
| TPS                  | Microcarri | 0.10731        | n.s          | TPS                  | Microcarr | 0.01959        | *            |
| Emulsion             | Microcarri | 0.86682        | n.s          | Emulsion             | Microcarr | 0.25349        | n.s          |
| P6                   | P8         | 0.93928        | n.s          | P6                   | P8        | 0.87825        | n.s          |
| P6                   | P4         | 3.51E-04       | ***          | P6                   | P4        | 3.35E-04       | ***          |
| P8                   | P4         | 1.62E-04       | ***          | P8                   | P4        | 2.22E-04       | ***          |

**Supplementary Table S16.** Summary of statistical analysis for data presented in Supplementary Figure S7B.

| <b>One-way ANOVA</b> |               |          |              | <b>One-way</b>       |               |          |              |
|----------------------|---------------|----------|--------------|----------------------|---------------|----------|--------------|
| <b>BMP2</b>          |               |          |              | <b>RUNX2</b>         |               |          |              |
| <b>TPS</b>           |               | p-value  | significance | <b>TPS</b>           |               | p-value  | significance |
| P6                   | P8            | 0.44717  | n.s          | P6                   | P8            | 0.44029  | n.s          |
| <b>Emulsion</b>      |               | p-value  | significance | <b>Emulsion</b>      |               | p-value  | significance |
| P4                   | P6            | 0.93962  | n.s          | P4                   | P6            | 0.38852  | n.s          |
| P4                   | P8            | 0.08311  | n.s          | P4                   | P8            | 0.97765  | n.s          |
| P6                   | P8            | 0.2621   | n.s          | P6                   | P8            | 0.32404  | n.s          |
| <b>Microcarriers</b> |               | p-value  | significance | <b>Microcarriers</b> |               | p-value  | significance |
| P4                   | P6            | 0.8264   | n.s          | P4                   | P6            | 0.9194   | n.s          |
| P4                   | P8            | 0.21989  | n.s          | P4                   | P8            | 0.42548  | n.s          |
| P6                   | P8            | 0.1455   | n.s          | P6                   | P8            | 0.25468  | n.s          |
| <b>P4</b>            |               | p-value  | significance | <b>P4</b>            |               | p-value  | significance |
| microcarriers        | Emulsion      | 0.16155  | n.s          | microcarriers        | Emulsion      | 0.34046  | n.s          |
| <b>P6</b>            |               | p-value  | significance | <b>P6</b>            |               | p-value  | significance |
| emulsion             | TPS           | 0.57149  | n.s          | emulsion             | TPS           | 0.8686   | n.s          |
| Microcarriers        | TPS           | 0.46172  | n.s          | Microcarriers        | TPS           | 0.95121  | n.s          |
| Microcarriers        | Emulsion      | 0.98015  | n.s          | Microcarriers        | Emulsion      | 0.97361  | n.s          |
| <b>P8</b>            |               | p-value  | significance | <b>P8</b>            |               | p-value  | significance |
| emulsion             | TPS           | 0.93436  | n.s          | emulsion             | TPS           | 0.87293  | n.s          |
| Microcarriers        | TPS           | 0.96137  | n.s          | Microcarriers        | TPS           | 0.83492  | n.s          |
| Microcarriers        | Emulsion      | 0.99561  | n.s          | Microcarriers        | Emulsion      | 0.99672  | n.s          |
| <b>Two-way ANOVA</b> |               | p-value  | significance | <b>Two-way</b>       |               | p-value  | significance |
| Emulsion             | TPS           | 0.28245  | n.s          | Emulsion             | TPS           | 0.97961  | n.s          |
| TPS                  | Microcarriers | 0.52784  | n.s          | TPS                  | Microcarriers | 0.97007  | n.s          |
| Emulsion             | Microcarriers | 0.85238  | n.s          | Emulsion             | Microcarriers | 0.88189  | n.s          |
| P6                   | P8            | 0.05056  | n.s          | P6                   | P8            | 0.06533  | n.s          |
| P6                   | P4            | 9.23E-01 | n.s          | P6                   | P4            | 4.48E-01 | n.s          |
| P8                   | P4            | 1.42E-02 | *            | P8                   | P4            | 6.25E-01 | n.s          |

**One-way ANOVA****COL1A1**

| TPS |    | p-value | significance |
|-----|----|---------|--------------|
| P6  | P8 | 0.50844 | n.s          |

| Emulsion |    | p-value | significance |
|----------|----|---------|--------------|
| P4       | P6 | 0.28093 | n.s          |
| P4       | P8 | 0.76356 | n.s          |
| P6       | P8 | 0.67766 | n.s          |

| Microcarriers |    | p-value | significance |
|---------------|----|---------|--------------|
| P4            | P6 | 0.43297 | n.s          |
| P4            | P8 | 0.63625 | n.s          |
| P6            | P8 | 0.93938 | n.s          |

| P4 microcarriers |          | p-value | significance |
|------------------|----------|---------|--------------|
|                  | Emulsion | 0.84449 | n.s          |

| P6 emulsion      |          | p-value | significance |
|------------------|----------|---------|--------------|
|                  | TPS      | 0.47655 | n.s          |
| P6 Microcarriers |          | p-value | significance |
|                  | TPS      | 0.62498 | n.s          |
| P6 Microcarriers |          | p-value | significance |
|                  | Emulsion | 0.96479 | n.s          |

| P8 emulsion      |          | p-value | significance |
|------------------|----------|---------|--------------|
|                  | TPS      | 0.88299 | n.s          |
| P8 Microcarriers |          | p-value | significance |
|                  | TPS      | 0.95326 | n.s          |
| P8 Microcarriers |          | p-value | significance |
|                  | Emulsion | 0.98185 | n.s          |

| Two-way ANOVA |               | p-value  | significance |
|---------------|---------------|----------|--------------|
| Emulsion      | TPS           | 0.99995  | n.s          |
| TPS           | Microcarriers | 0.96398  | n.s          |
| Emulsion      | Microcarriers | 0.95196  | n.s          |
| P6            | P8            | 0.97671  | n.s          |
| P6            | P4            | 9.77E-02 | n.s          |
| P8            | P4            | 1.40E-01 | n.s          |

**One-way ANOVA****OCN**

| TPS |    | p-value | significance |
|-----|----|---------|--------------|
| P6  | P8 | 0.32232 | n.s          |

| Emulsion |    | p-value | significance |
|----------|----|---------|--------------|
| P4       | P6 | 0.99959 | n.s          |
| P4       | P8 | 0.90378 | n.s          |
| P6       | P8 | 0.8921  | n.s          |

| Microcarriers |    | p-value | significance |
|---------------|----|---------|--------------|
| P4            | P6 | 0.61884 | n.s          |
| P4            | P8 | 0.82157 | n.s          |
| P6            | P8 | 0.97246 | n.s          |

| P4 microcarriers |          | p-value | significance |
|------------------|----------|---------|--------------|
|                  | Emulsion | 0.48542 | n.s          |

| P6 emulsion      |          | p-value | significance |
|------------------|----------|---------|--------------|
|                  | TPS      | 0.62279 | n.s          |
| P6 Microcarriers |          | p-value | significance |
|                  | TPS      | 0.24878 | n.s          |
| P6 Microcarriers |          | p-value | significance |
|                  | Emulsion | 0.74316 | n.s          |

| P8 emulsion      |          | p-value | significance |
|------------------|----------|---------|--------------|
|                  | TPS      | 0.92011 | n.s          |
| P8 Microcarriers |          | p-value | significance |
|                  | TPS      | 0.92507 | n.s          |
| P8 Microcarriers |          | p-value | significance |
|                  | Emulsion | 0.99945 | n.s          |

| Two-way ANOVA |               | p-value  | significance |
|---------------|---------------|----------|--------------|
| Emulsion      | TPS           | 0.43334  | n.s          |
| TPS           | Microcarriers | 0.33637  | n.s          |
| Emulsion      | Microcarriers | 0.96465  | n.s          |
| P6            | P8            | 0.80304  | n.s          |
| P6            | P4            | 9.95E-01 | n.s          |
| P8            | P4            | 7.84E-01 | n.s          |



**Supplementary Table S17.** Summary of statistical analysis for data presented in Supplementary Figure S7C.

| One-way              |          |          |              |
|----------------------|----------|----------|--------------|
| <b>SOX9</b>          |          |          |              |
| <b>Emulsion</b>      |          | p-value  | significance |
| P4                   | P8       | 0.12528  | n.s          |
| <b>Microcarriers</b> |          | p-value  | significance |
| P4                   | P6       | 0.06613  | n.s          |
| <b>P4</b>            |          | p-value  | significance |
| microcar             | Emulsion | 0.25094  | n.s          |
| <b>P8</b>            |          | p-value  | significance |
| emulsion             | TPS      | 0.79072  | n.s          |
| Microcar             | TPS      | 0.75218  | n.s          |
| Microcar             | Emulsion | 0.99725  | n.s          |
| <b>Two-way ANOVA</b> |          | p-value  |              |
| TPS                  | Microcar | 0.97946  | n.s          |
| Emulsion             | TPS      | 0.45244  | n.s          |
| Emulsion             | Microcar | 0.38825  | n.s          |
| P8                   | P4       | 2.37E-02 | *            |

| One-way              |          |          |              |
|----------------------|----------|----------|--------------|
| <b>COL2A1</b>        |          |          |              |
| <b>Emulsion</b>      |          | p-value  | significance |
| P4                   | P6       | 0.32709  | n.s          |
| <b>Microcarriers</b> |          | p-value  | significance |
| P4                   | P6       | 0.31348  | n.s          |
| <b>P4</b>            |          | p-value  | significance |
| microcarrier         | Emulsion | 0.69482  | n.s          |
| <b>P8</b>            |          | p-value  | significance |
| emulsion             | TPS      | 0.45523  | n.s          |
| Microcarrier         | TPS      | 0.44355  | n.s          |
| Microcarrier         | Emulsion | 0.99968  | n.s          |
| <b>Two-way ANOVA</b> |          | p-value  |              |
| Emulsion             | TPS      | 0.60991  | n.s          |
| TPS                  | Microcar | 0.85571  | n.s          |
| Emulsion             | Microcar | 0.85034  | n.s          |
| P8                   | P4       | 8.42E-02 | n.s          |

| One-way              |             |          |              |
|----------------------|-------------|----------|--------------|
| <b>COL10A1</b>       |             |          |              |
| <b>Emulsion</b>      |             | p-value  | significance |
| P4                   | P6          | 0.25061  | n.s          |
| <b>Microcarriers</b> |             | p-value  | significance |
| P4                   | P6          | 0.26102  | n.s          |
| <b>P4</b>            |             | p-value  | significance |
| microcarr            | Emulsion    | 0.3661   | n.s          |
| <b>P8</b>            |             | p-value  | significance |
| emulsion             | TPS         | 0.84121  | n.s          |
| Microcarr            | TPS         | 0.80925  | n.s          |
| Microcarr            | Emulsion    | 0.99784  | n.s          |
| <b>Two-way ANOVA</b> |             | p-value  |              |
| TPS                  | Microcarrie | 0.95874  | n.s          |
| Emulsion             | TPS         | 0.50956  | n.s          |
| Emulsion             | Microcarrie | 0.5209   | n.s          |
| P8                   | P4          | 7.45E-02 | n.s          |
